# Supplementary material
Source: publisher site journal article supplement (https://e-cmh.org/upload/media/cmh-2024-0042-Supplementary-Fig-4.pdf)
Supplement: Supplementary file 1 [file cmh-2024-0042-Supplementary-Fig-4.pdf]

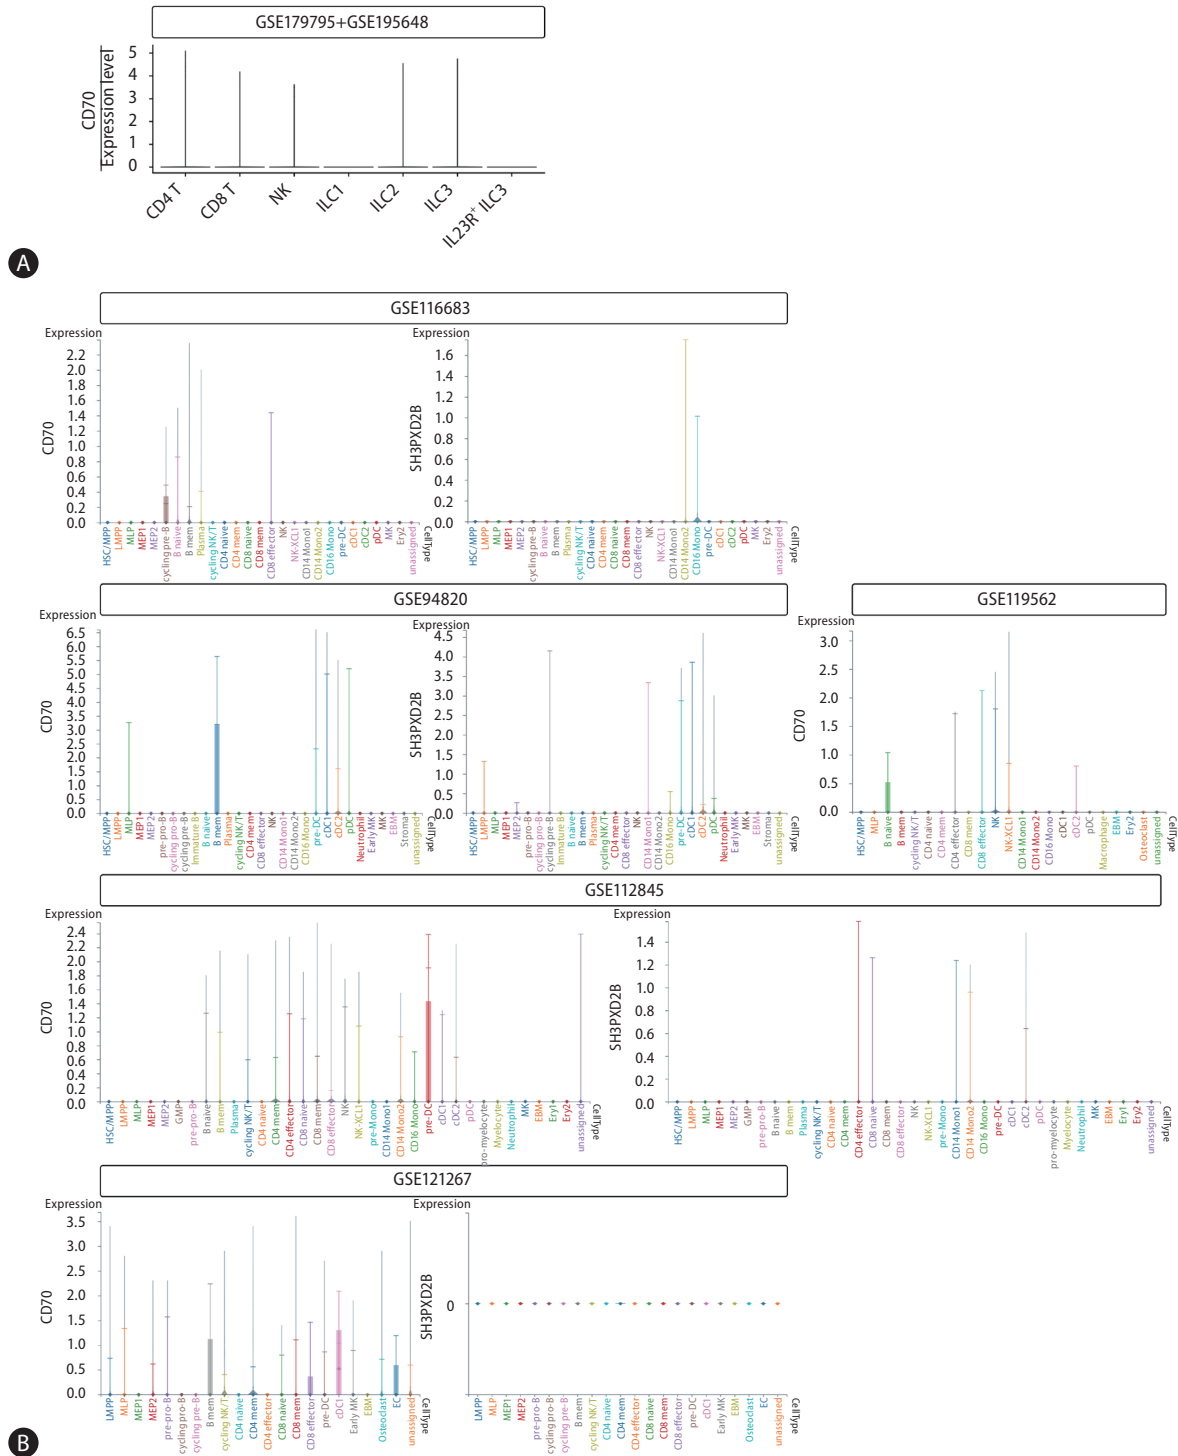

**Supplementary Figure 4.** Single-cell analysis of CD70 and SH3PXD2B using extended datasets. (A) A Violin plot displaying relative expression of CD70 in the GSE179795 + GSE195648 dataset. (B) Box plots displaying relative expression of CD70 and SH3PXD2B in multiple datasets included in the ABC portal.
